# Supplementary material for: Association Signals Unveiled by a Comprehensive Gene Set Enrichment Analysis of Dental Caries Genome-Wide Association Studies
Source: PLoS One. 2013 Aug 14;8(8):e72653. doi: 10.1371/journal.pone.0072653 (PMC3743773; doi:10.1371/journal.pone.0072653)
Supplement: Table S1 — List of genes that are nominally significant with dental caries in the 30 top GO terms. This table includes 383 nominally significant genes that appeared in the top 30 GO terms shown in Table 2. Genes that have at least one SNP with a p-value < 0.05 are regarded as nominally significant genes (without multiple testing correction). (XLSX) [file pone.0072653.s001.xlsx]

## Sheet: Sheet1
Table S1. List of genes that are nominally significant with dental caries in the 30 top GO terms.
Genea	# GO terms invloved	Ratio of significant SNPsb	Most significant SNP (p value)	Ingenuity function annotationc
PARK2	6	28/512	rs574165 (0.001)
UBR3	6	2/36	rs16857407 (0.02)
ANAPC10	5	1/8	rs1455137 (0.035)
BRAP	5	1/11	rs10744774 (0.019)
CADM1	5	2/72	rs6589485 (0.006)
CARD8	5	5/23	rs10416565 (0.008)
CBL	5	2/13	rs2249466 (0.027)
CRTAM	5	2/22	rs3107606 (0.009)
DDB2	5	2/7	rs3781619 (0.013)
FBXL6	5	3/8	rs3817681 (0.016)
FBXO22	5	3/5	rs335675 (0.011)
FBXO3	5	1/28	rs831627 (0.004)
FBXO7	5	8/29	rs738263 (0.007)
GLMN	5	1/3	rs3103174 (0.017)
INS	5	3/9	rs11042978 (0.002)
MALT1	5	3/22	rs9783885 (0.021)
MYLIP	5	6/18	rs11969250 (0.004)
NLRP3	5	3/40	rs9988572 (0.001)
RNF217	5	2/42	rs552705 (0.029)
SMURF1	5	2/16	rs12672417 (0.02)
UBE2D2	5	2/7	rs769052 (0.033)
UBE2E1	5	4/20	rs12629302 (0.008)
UBE2H	5	1/24	rs10246707 (0.024)
UBE2L3	5	1/10	rs13054355 (0.006)
UBE2M	5	3/8	rs7249714 (0.006)
UBR5	5	4/27	rs10102559 (0.003)
UHRF2	5	1/24	rs1547258 (0.03)
WWP2	5	3/28	rs7200005 (0.011)
ZER1	5	1/4	rs10988111 (0.017)
APOA1	4	1/6	rs10047459 (0.015)
CCKBR	4	2/19	rs2880829 (0.004)
CIDEA	4	1/16	rs8084404 (0.04)
FOXP3	4	1/7	rs5906761 (0.016)
NLRP12	4	2/19	rs7259148 (0.005)
ROBO2	4	15/171	rs9836971 (0.005)
SLIT2	4	6/106	rs12503652 (0.003)
ANG	3	3/18	rs1320482 (0.001)
EIF2B1	3	1/12	rs11572966 (0.05)
EIF2B2	3	1/2	rs8014403 (0.012)
EIF2B3	3	11/21	rs10159318 (0.009)
GALR1	3	1/25	rs8097893 (0.023)
GCLC	3	1/24	rs2268327 (0.024)
KLK8	3	4/16	rs1654520 (0.037)
LRRC4C	3	9/70	rs6485187 (0.007)
MAPT	3	2/21	rs11867549 (0.02)
MC2R	3	14/42	rs12454469 (0.001)
NMUR1	3	1/9	rs7597348 (0.031)
ROBO1	3	5/138	rs3773195 (0.016)
RTN4	3	4/32	rs17046586 (0.025)
SSTR1	3	3/13	rs2250334 (0.014)
SSTR3	3	2/16	rs739041 (0.028)
TACR1	3	20/54	rs759588 (0)
TACR3	3	3/34	rs2868397 (0.026)
UGCG	3	4/27	rs10981171 (0.024)
ABCA1	2	2/183	rs4149338 (0.013)
ABCG1	2	11/108	rs748319 (0.01)
ADORA2A	2	1/13	rs5996697 (0.026)
ARFIP1	2	3/13	rs7672014 (0.014)
ASAH1	2	14/46	rs7508 (0.002)
ASAH2	2	6/19	rs1865749 (0)
B3GNT5	2	1/10	rs6783373 (0.049)
C5AR1	2	2/3	rs7254232 (0.003)
CERK	2	8/27	rs885792 (0.005)
CNTN4	2	19/495	rs2619575 (0.001)
EIF2A	2	1/14	rs9830228 (0.038)
EIF2S3	2	7/8	rs10283978 (0.024)
EIF3D	2	2/19	rs1000427 (0.045)
EIF3E	2	3/7	rs13279663 (0.012)
EIF3F	2	5/20	rs12420107 (0.001)
GLI2	2	2/37	rs4848637 (0.013)	Dental development; dental morphology; dental lack
LASS1	2	1/11	rs10403594 (0.023)
MYO3A	2	2/52	rs1935483 (0.025)
MYO6	2	1/30	rs3734313 (0.041)
NEU3	2	1/8	rs7115499 (0.036)
NSMAF	2	2/23	rs4737508 (0.04)
OPRK1	2	2/25	rs1425903 (0.004)
OPRM1	2	7/80	rs6923231 (0.014)
PAICS	2	2/11	rs1401908 (0.002)
PAX2	2	7/24	rs11190695 (0.013)
POU6F2	2	9/125	rs17171521 (0.002)
S100B	2	3/14	rs2839343 (0.001)
SGPL1	2	1/32	rs17533359 (0.034)
SHH	2	2/15	rs288765 (0.023)	Dental development; dental cord development; dental morphology; dental content; dental size; dental disorder
SLIT1	2	5/74	rs701808 (0.003)
SYVN1	2	6/8	rs1152639 (0.002)
UNC5C	2	16/156	rs6850673 (0.002)
A4GNT	1	2/7	rs397266 (0.004)
ABCA4	1	6/206	rs1105123 (0.02)
ABCB11	1	16/123	rs17267869 (0.012)
ABCF1	1	5/57	rs17195474 (0.024)
ABLIM1	1	7/83	rs11196802 (0.002)
ACCN1	1	16/419	rs223031 (0.014)
ACCN3	1	1/18	rs2303933 (0.012)
ACTA1	1	1/5	rs506388 (0.048)
ACTN1	1	5/61	rs3742888 (0.001)
ACTN2	1	4/41	rs7514673 (0.003)
ADAMTS9	1	9/79	rs9828674 (0.008)
ADSS	1	6/17	rs3127465 (0.006)
AFF2	1	1/70	rs1867024 (0.037)
AIPL1	1	1/28	rs10445297 (0.036)
AKR1C4	1	3/18	rs12775790 (0.003)
ALDH3A2	1	6/30	rs962800 (0.023)
ALG5	1	1/10	rs9603126 (0.036)
ALG6	1	1/17	rs3004318 (0.021)
ALK	1	14/327	rs4473345 (0.001)
ALS2	1	1/35	rs9973862 (0.014)
ARFGAP3	1	1/11	rs5758991 (0.006)
ARHGEF11	1	4/17	rs1336149 (0.009)
ARL4D	1	1/6	rs4792990 (0.039)
ASNS	1	1/14	rs10269471 (0.012)
ATF3	1	2/43	rs4951629 (0.041)
ATF5	1	1/14	rs7257503 (0.031)
ATN1	1	3/11	rs2110071 (0.004)
ATP6V0A4	1	4/48	rs6944016 (0.008)
ATP6V1B1	1	7/24	rs2266917 (0.001)
B3GALT2	1	1/6	rs10754051 (0.038)
B3GALT5	1	2/20	rs4173 (0.002)
B3GAT2	1	2/41	rs490887 (0.007)
B3GNT6	1	2/5	rs1894008 (0.014)
B4GALNT2	1	1/14	rs16970025 (0.046)
B4GALT1	1	2/26	rs7854765 (0.025)
B4GALT4	1	1/14	rs2717265 (0.033)
B4GALT5	1	2/17	rs6125699 (0.031)
BACE2	1	2/71	rs8133241 (0.017)
BCAR1	1	1/17	rs4888367 (0.016)
BCOR	1	4/13	rs5963728 (0.012)	Dental development; dental mineralization
BDKRB1	1	10/43	rs2069598 (0.01)
BDKRB2	1	14/57	rs1959053 (0)
BOLL	1	5/13	rs4850808 (0.02)
BPTF	1	2/29	rs9902521 (0.019)
CACNA1F	1	1/8	rs3810680 (0.048)
CASP8AP2	1	2/13	rs17707738 (0.039)
CDH23	1	4/185	rs10999904 (0.029)
CELSR1	1	7/72	rs6008891 (0)
CHD2	1	5/47	rs2388056 (0.008)
CHD4	1	1/7	rs1558333 (0.048)
CHML	1	2/11	rs672477 (0.033)
CLRN1	1	2/23	rs4680058 (0.005)
CNGA3	1	2/25	rs1857745 (0.001)
CNGB1	1	2/46	rs2303785 (0.019)
CNGB3	1	2/59	rs12678304 (0.04)
CNTN6	1	26/200	rs17037117 (0.002)
COCH	1	1/15	rs17367359 (0.02)
COL18A1	1	3/43	rs4819085 (0.009)
CPS1	1	4/28	rs2287603 (0.036)
CREG1	1	1/39	rs1003815 (0.023)
CRX	1	2/22	rs12979616 (0.028)
CRYBB1	1	1/13	rs9613221 (0.028)
CRYBB2	1	2/25	rs5752079 (0.007)
CRYBB3	1	2/29	rs5752079 (0.007)
CRYGA	1	1/17	rs796272 (0.026)
CRYGD	1	1/18	rs4277502 (0.03)
CTPS2	1	4/13	rs7049850 (0.037)
CYFIP1	1	6/71	rs3693 (0.011)
CYP1B1	1	1/23	rs163077 (0.032)
DCLK1	1	5/112	rs1891673 (0.024)
DHRS3	1	1/30	rs1892067 (0.04)
DIAPH1	1	2/15	rs2237079 (0.027)	Dental disorder; dental malocclusion
DMBX1	1	2/12	rs1267305 (0.041)
DNER	1	5/107	rs4246635 (0.011)
DOCK2	1	8/195	rs6872596 (0.011)
DPM3	1	1/4	rs11264329 (0.035)
DRP2	1	3/9	rs5921756 (0.008)
DSCAML1	1	11/168	rs1574433 (0.009)
DST	1	7/52	rs9382665 (0.012)
E2F1	1	1/2	rs2071056 (0.045)
EEF2K	1	1/18	rs2290829 (0.048)
ELK3	1	3/22	rs4762140 (0.002)
EML2	1	5/16	rs1045217 (0.02)
ERCC2	1	1/8	rs1618536 (0.011)
ERCC3	1	2/12	rs4150448 (0.028)
ERCC6	1	4/26	rs4253077 (0.024)
EXT1	1	11/96	rs9649944 (0.009)
EYA1	1	10/77	rs6983443 (0)
EYA3	1	2/22	rs1578213 (0.02)
EYA4	1	6/103	rs439123 (0.024)
F2RL2	1	3/27	rs463815 (0.005)
FARP1	1	7/136	rs6956 (0.011)
FARP2	1	7/33	rs17387035 (0.001)
FEZ1	1	3/15	rs485680 (0.017)
FPR1	1	1/21	rs17695032 (0.017)
FSCN2	1	1/10	rs3924327 (0.001)
FUT5	1	1/11	rs1674154 (0.048)
FUT7	1	1/7	rs12337910 (0.009)
FUT8	1	1/42	rs13379229 (0.048)
FUT9	1	21/58	rs10498999 (0)
G3BP1	1	1/5	rs2964574 (0.02)
GALNT2	1	1/86	rs3213495 (0.029)
GALNT4	1	2/4	rs2220729 (0.01)
GALNT5	1	2/12	rs1481237 (0.002)
GALNT6	1	1/21	rs2067763 (0.045)
GALNT8	1	2/21	rs10849144 (0.032)
GBE1	1	8/28	rs2594547 (0.007)
GCNT3	1	1/7	rs8035572 (0.014)
GNAS	1	1/17	rs919197 (0.017)
GPR143	1	1/13	rs2521579 (0.01)
GPR17	1	1/19	rs2288657 (0.022)
GRIK1	1	2/121	rs363478 (0.034)
GRM8	1	17/235	rs2299460 (0.001)
GTF2H3	1	1/15	rs11572966 (0.05)
GUCA1A	1	7/29	rs10948014 (0.001)
GUCY2D	1	1/13	rs4130509 (0.023)
HIPK2	1	3/15	rs10954650 (0)
HLCS	1	2/69	rs12151959 (0.03)
HSBP1	1	1/28	rs16961910 (0.014)
HSF4	1	1/5	rs7192639 (0.005)
HTT	1	6/28	rs10488840 (0.02)
ID4	1	1/20	rs7771384 (0.039)
IL1RAPL2	1	5/80	rs17332162 (0.005)
IMPG1	1	11/46	rs3798579 (0.004)
JARID2	1	3/85	rs2237122 (0.023)
JRKL	1	3/4	rs10765805 (0.019)
JUNB	1	1/2	rs1205171 (0.037)
KCNE1	1	1/38	rs727957 (0.032)
KCNIP3	1	6/10	rs3821340 (0.007)
KCNQ1	1	15/148	rs2299620 (0.006)
KCNQ4	1	3/23	rs4660468 (0.031)
KLF12	1	8/147	rs17312529 (0.009)
LARGE	1	24/252	rs17735172 (0.001)
LAYN	1	2/7	rs542275 (0.006)
LHX6	1	1/28	rs10985568 (0.017)
LIMA1	1	2/12	rs4459386 (0.039)
LTBP2	1	6/35	rs862037 (0.008)
MAL	1	1/9	rs7604922 (0.031)
MAP1S	1	1/11	rs2161489 (0.01)
MAS1	1	1/8	rs12207188 (0.045)
MBD1	1	4/12	rs1562004 (0.012)
MBP	1	5/93	rs8094745 (0.022)
MDGA1	1	1/57	rs4714092 (0.036)
MDGA2	1	8/101	rs1981283 (0.002)
ME1	1	10/37	rs1144189 (0.017)
MEIS2	1	2/85	rs1450420 (0.028)
MGAT2	1	1/5	rs9989177 (0.05)
MNT	1	2/13	rs17834783 (0.007)
MSH2	1	5/19	rs2042649 (0.027)
MSH6	1	1/14	rs2651766 (0.043)
MTAP	1	1/22	rs4345650 (0.001)
MTRF1	1	1/10	rs2324805 (0.034)
MYH9	1	2/44	rs2294357 (0.04)
MYO15A	1	7/25	rs12936694 (0.009)
MYO16	1	7/183	rs3858816 (0.005)
MYO7A	1	1/37	rs3758708 (0.034)
MYO9B	1	2/30	rs1979260 (0.031)
NCKAP1	1	1/18	rs11677624 (0.011)
NCOR1	1	10/16	rs9909697 (0.015)
NCOR2	1	2/64	rs1110904 (0.003)
NDUFB9	1	1/20	rs3829038 (0.031)
NDUFS4	1	4/52	rs2637030 (0.009)
NEUROG3	1	1/19	rs10509320 (0.012)
NFIL3	1	4/14	rs2482704 (0)
NFKBIL2	1	3/16	rs2721195 (0.007)
NKX2-2	1	1/6	rs17744800 (0.03)
NPAS2	1	3/65	rs12989454 (0.014)
NPBWR2	1	2/8	rs13039817 (0.025)
NPHP3	1	1/19	rs9811369 (0.033)
NPTX1	1	1/10	rs4453556 (0.039)
NR1D1	1	1/10	rs4794826 (0.015)
NR1H4	1	5/26	rs12304867 (0.01)
NR2F2	1	1/6	rs3743462 (0.05)
NRIP1	1	4/20	rs1297214 (0.007)
NRP1	1	4/77	rs2284944 (0.011)
NRP2	1	1/47	rs849560 (0.032)
NRXN1	1	13/320	rs9752732 (0.002)
NRXN3	1	29/353	rs8011654 (0.007)
NTNG1	1	4/94	rs6664221 (0.009)
NTNG2	1	3/36	rs1412076 (0.039)
NTSR2	1	1/10	rs11690767 (0.022)
OCLM	1	3/9	rs2383477 (0.007)
OPA1	1	1/16	rs7624750 (0.034)
OPA3	1	5/21	rs1045217 (0.02)
OPCML	1	20/432	rs7947822 (0.004)
OPHN1	1	1/42	rs2768577 (0.027)
OPN4	1	4/19	rs2803546 (0.008)
OPRD1	1	1/18	rs499062 (0.05)
OPRL1	1	4/10	rs6062342 (0.013)
OR1D2	1	2/7	rs1121693 (0.018)
OR1D5	1	1/6	rs1121693 (0.018)
OTOF	1	19/48	rs7592040 (0.001)
OXTR	1	5/51	rs237915 (0.001)
PAIP2B	1	1/20	rs9309448 (0.046)
PARD3	1	2/138	rs1290002 (0.007)
PARD6B	1	1/11	rs231584 (0.005)
PAWR	1	1/14	rs2463107 (0.041)
PAX3	1	3/42	rs1549773 (0.027)
PBX1	1	6/95	rs10494426 (0.004)	Dental disorder; micrognathia
PBX3	1	4/23	rs10987080 (0.003)	Dental disorder; micrognathia
PCDH15	1	8/292	rs1342309 (0.003)
PCP4	1	8/53	rs2238703 (0.006)
PDC	1	3/3	rs1882926 (0.021)
PDE6A	1	1/30	rs26122 (0.016)
PDE6D	1	1/17	rs838437 (0.049)
PDE6G	1	1/6	rs3830068 (0.02)
PDE6H	1	1/14	rs2233623 (0.024)
PDGFC	1	5/34	rs2974254 (0.008)
PFAS	1	1/9	rs4792722 (0.032)
PHGDH	1	5/21	rs17024167 (0.01)
PIAS1	1	1/14	rs10518758 (0.009)
PIGA	1	4/8	rs6632329 (0.04)
PIGZ	1	1/15	rs4916586 (0.031)
PLRG1	1	1/12	rs12642469 (0.015)
PNOC	1	3/20	rs10503827 (0.021)
POU3F4	1	1/3	rs12687891 (0.04)
POU4F3	1	3/6	rs2277016 (0.006)
POU6F1	1	1/11	rs11738 (0.032)
PPP1R13L	1	1/9	rs1618536 (0.011)
PREX1	1	15/57	rs6066829 (0.001)
PROK2	1	2/12	rs4677048 (0.013)
PSEN2	1	1/9	rs16846644 (0.008)
PTEN	1	1/16	rs10509532 (0.046)
PTPRC	1	2/24	rs3754098 (0.042)
PTPRZ1	1	2/41	rs1011692 (0.01)
RAD54B	1	1/10	rs3099407 (0.026)
RBM9	1	1/37	rs4821451 (0.05)
RCAN1	1	1/42	rs727957 (0.032)
RDH5	1	1/6	rs3138136 (0.023)
RECQL	1	1/31	rs17849408 (0.002)
RECQL4	1	1/4	rs1063739 (0.049)	dental disorder
RELB	1	2/6	rs3786507 (0.017)
RGR	1	1/20	rs3814211 (0.03)
RGS16	1	2/8	rs486907 (0.002)
RLBP1	1	2/11	rs2238312 (0.028)
RP2	1	1/3	rs5952966 (0.017)
RPE65	1	5/25	rs3118419 (0.023)
RPGR	1	5/26	rs4084271 (0.001)
RPN1	1	1/9	rs9811380 (0.014)
RPS6KA6	1	4/89	rs5922954 (0.028)
RTN4RL1	1	4/31	rs11651343 (0.02)
RUVBL1	1	1/7	rs9860614 (0.006)
RYBP	1	2/16	rs4676875 (0.035)
SAG	1	7/22	rs838705 (0.006)
SAMD4A	1	5/65	rs2025130 (0.005)
SCN10A	1	5/41	rs4395346 (0.001)
SDF2	1	1/1	rs622463 (0.024)
SERPINI1	1	2/25	rs11921535 (0.028)
SH3GL2	1	11/100	rs12380813 (0.002)
SH3GL3	1	2/66	rs1542745 (0.034)
SHROOM2	1	4/48	rs11095524 (0.001)
SHROOM4	1	1/22	rs2316200 (0.004)
SLC10A2	1	3/43	rs8001731 (0.005)
SLC16A7	1	10/42	rs995342 (0.001)
SLC26A4	1	3/26	rs2395910 (0.013)
SLC26A5	1	3/32	rs12164066 (0.024)
SLC6A6	1	3/52	rs4685158 (0.004)
SLIT3	1	27/275	rs1875972 (0.004)
SMARCAL1	1	1/22	rs560025 (0.041)
SNCA	1	1/27	rs3822095 (0.036)
SORBS1	1	16/98	rs726175 (0.003)
SOX3	1	1/4	rs5907591 (0.044)	Dental morphology
SOX8	1	1/20	rs3809673 (0.041)
SPHK1	1	2/9	rs346811 (0.012)
SPON2	1	1/8	rs2242278 (0.016)
STT3A	1	4/17	rs11220164 (0.011)
SUPV3L1	1	1/17	rs10998624 (0.035)
TACSTD2	1	2/9	rs14008 (0.008)
TAGLN3	1	1/28	rs1609796 (0.033)
TAS1R1	1	1/9	rs4908932 (0.048)
TBL1X	1	13/66	rs845441 (0.001)
TFCP2L1	1	3/25	rs2580344 (0.003)
TFEC	1	4/20	rs12706065 (0.011)
TGIF1	1	3/26	rs11661340 (0.026)
THRB	1	6/163	rs12107078 (0.019)
TIAM1	1	10/125	rs2073372 (0.002)
TIMM13	1	1/8	rs8108768 (0.049)
TRIB3	1	2/20	rs7265169 (0.011)
TRIM22	1	1/31	rs16926648 (0.008)
TRIM28	1	3/5	rs7249714 (0.006)
TULP1	1	4/15	rs4711420 (0.01)
TULP2	1	2/14	rs10420053 (0.02)
TUSC3	1	15/109	rs1840418 (0.002)
UBE2E2	1	29/53	rs1353322 (0)
UBE3A	1	6/13	rs12899183 (0.014)
UNC119	1	1/5	rs631905 (0.021)
USH1C	1	11/53	rs7102164 (0.014)
USH2A	1	5/218	rs12748877 (0.028)
VAX2	1	5/20	rs2266917 (0.001)
VCL	1	6/18	rs3180427 (0.002)
WNT1	1	1/3	rs3782353 (0.019)
WRN	1	1/31	rs1800391 (0.038)
XRCC5	1	3/28	rs2303400 (0.016)
YAF2	1	1/11	rs712123 (0.047)
ZBTB16	1	14/110	rs10488695 (0.006)
ZFPM2	1	4/114	rs2122444 (0.008)
ZNF136	1	1/8	rs893546 (0.004)
aGenes that have at least one SNP with a p-value < 0.05 from the dental caries GWAS dataset were listed in this table. bThe numerator is the number of SNPs with a p-value < 0.05 based on dental caries GWAS data, and the denominator is the total number of SNPs in each gene. cEight significant genes have function annotations related with keyword “dental” in the Ingenuity Pathway Analysis (IPA, http…
